# Supplementary material
Source: PubMed Central journal article supplement (PMC5559308)
Supplement: NIHMS867754-supplement-1.pdf [file NIHMS867754-supplement-1.pdf]

**Supplemental Table 1. Clinicopathological characteristics of HNC patients enrolled in the study**

|                             | <b>Patients<br/>(n=38)</b> |     |
|-----------------------------|----------------------------|-----|
|                             | n                          | %   |
| <b>Age (mean±SD; years)</b> |                            |     |
| ≤ 60 ± 13                   | 19                         | 50  |
| > 60 ± 13<br>(range: 24-79) | 19                         | 50  |
| <b>Gender</b>               |                            |     |
| male                        | 29                         | 76  |
| female                      | 9                          | 24  |
| <b>Disease status</b>       |                            |     |
| AD                          | 19                         | 50  |
| REC                         | 4                          | 11  |
| NED                         | 15                         | 39  |
| <b>Primary tumor site</b>   |                            |     |
| Oral cavity                 | 23                         | 61  |
| Oropharynx                  | 13                         | 34  |
| Larynx                      | 2                          | 5   |
| <b>Tumor stage</b>          |                            |     |
| T <sub>1</sub>              | 15                         | 39  |
| T <sub>2</sub>              | 14                         | 37  |
| T <sub>3</sub>              | 2                          | 5   |
| T <sub>4</sub>              | 6                          | 16  |
| Undefined                   | 1                          | 3   |
| <b>Nodal status</b>         |                            |     |
| N <sub>0</sub>              | 21                         | 55  |
| N <sub>1</sub>              | 4                          | 11  |
| N <sub>2</sub>              | 13                         | 34  |
| <b>Distant metastasis</b>   |                            |     |
| M <sub>0</sub>              | 38                         | 100 |
| <b>UICC stage</b>           |                            |     |
| I                           | 9                          | 24  |
| II                          | 6                          | 16  |
| III                         | 4                          | 10  |
| IV                          | 18                         | 47  |
| Undefined                   | 1                          | 3   |
| <b>Tumor grade</b>          |                            |     |
| G <sub>1</sub>              | 3                          | 8   |
| G <sub>2</sub>              | 23                         | 60  |
| G <sub>3</sub>              | 1                          | 3   |
| Undefined                   | 11                         | 29  |
| <b>HPV status (p16 IHC)</b> |                            |     |
| Positive                    | 10                         | 26  |
| Negative                    | 8                          | 21  |
| Undefined                   | 20                         | 53  |
| <b>Alcohol consumption</b>  |                            |     |

---

|                            |    |    |
|----------------------------|----|----|
| Current                    | 21 | 56 |
| Former                     | 2  | 5  |
| Never                      | 13 | 34 |
| Undefined                  | 2  | 5  |
| <b>Tobacco consumption</b> |    |    |
| Current                    | 19 | 50 |
| Former                     | 7  | 18 |
| Never                      | 12 | 32 |
| <b>Therapy</b>             |    |    |
| Surgery alone              | 19 | 50 |
| Surgery + (C)RT            | 18 | 47 |
| Primary CRT                | 1  | 3  |

---

## Supplemental Figure 1

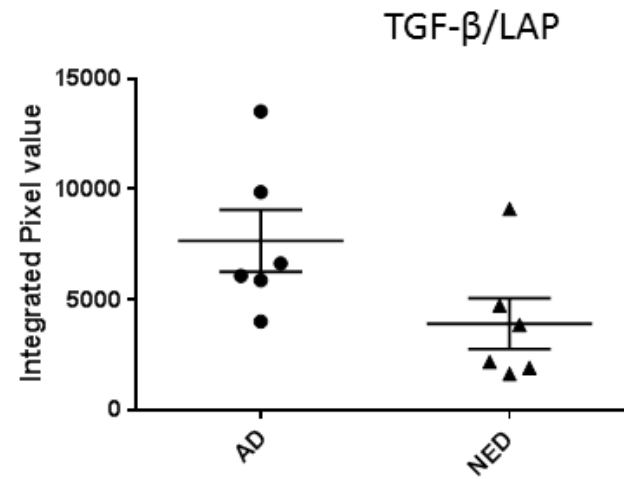

### Supplemental Figure 1

Densitometry results (integrated pixel values ) for TGF- $\beta$ /LAP in exosomes isolated from plasma of 6 HNC patients with AD and 6 with NED. Western blot bands were scanned for density as described in Materials and Methods. The bars are means  $\pm$  SEM.

Supplemental Figure 2

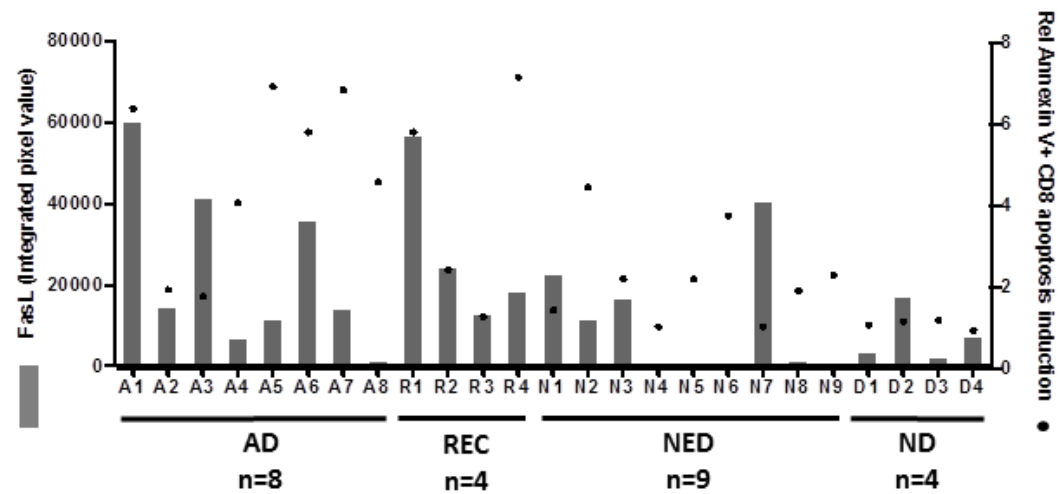

Supplemental Figure 2

CD8+ Jurkat cells were co-incubated with exosomes isolated from –plasma of patients with HNC as described in Methods. No correlation was established between exosome-mediated apoptosis of CD8+ Jurkat cells and FASL levels carried by exosomes from AD, REC and NED patients or NDs.
